# Supplementary material for: Prognostic Biomarkers for Survival in Nasopharyngeal Carcinoma: A Systematic Review of the Literature
Source: MDPI journal article supplement (doi:10.3390/cancers14092122), 2022-04-24
Supplement: s1 [file s1]

**Table S1: Literature search parameters on PubMed.** The advanced search tool in PubMed was utilized to scan for all the studies relevant to the search parameters from 2011 to 2021. Both Chinese and English languages were accepted. The search resulted in 460 items being returned for further screening and analysis.

| Criteria         | Search term*                                                                                                                                     |
|------------------|--------------------------------------------------------------------------------------------------------------------------------------------------|
| Diseases         | ((("nasopharyn*" [Title] AND ("carcinoma" [Title] OR "cancer" [Title] OR "neoplasm*" [Title])) OR ("NPC" [Title] AND "nasopharyn*" [Text Word])) |
| Theme            | ("stag*" [Title/Abstract] OR "TNM" [Title/Abstract] OR "prognos*" [Title/Abstract]) AND ("biomark*" [Title/Abstract])                            |
| Language         | ("Chinese" [Language] OR "English" [Language])                                                                                                   |
| Publication date | (2011:2021 [pdat])                                                                                                                               |
| Items returned   | 460                                                                                                                                              |

\*The literature search was performed on 9 September 2021.

**Table S2: Summary of sample sizes, quality scores, hazard ratios, confidence intervals, P-values and treatment responses of the primary and secondary endpoints reported in the studies.** The primary and secondary endpoints, along with their relevant data elements were extracted from the selected studies and systematically recorded. The HRs and P-values of each of the survival types reported in the studies depict that they are significant and independent of the multivariate clinical parameters. The high quality scores signify the low risk of bias present in the studies.

| Author, Year of publication | Prognostic factor              | Validation sample size | Independent sample size | Multivariate clinical parameters                                                                                                                                                                                                                                                                            | Survival type | HR <sup>1</sup> | 95% CI      | P-value               | Treatment response (HR, 95% CI, P-value)                                     | Quality score |
|-----------------------------|--------------------------------|------------------------|-------------------------|-------------------------------------------------------------------------------------------------------------------------------------------------------------------------------------------------------------------------------------------------------------------------------------------------------------|---------------|-----------------|-------------|-----------------------|------------------------------------------------------------------------------|---------------|
| Guo et al., 2015 [1]        | rs3740194 in <i>CELF2</i> gene | 1520                   | 2237 <sup>2</sup>       | <ol style="list-style-type: none"> <li>Gender (male vs female)</li> <li>Age (<math>\geq 50</math> vs. <math>&lt; 50</math> years)</li> <li>T status (T3-T4 vs T1-T2)</li> <li>N status (N2-N3 vs N0-N1)</li> <li>Radiotherapy (3D-RT vs 2D-RT)</li> <li>ICT (yes vs no)</li> <li>CCT (yes vs no)</li> </ol> | OS            | 1.53            | 1.23 – 1.89 | $1.30 \times 10^{-4}$ | 2D-RT only (1.88, 1.27-2.81, 0.002), 2D-RT plus CCT (1.60, 1.13-2.26, 0.007) | 15            |

---

<sup>1</sup> Adjusted

<sup>2</sup> Combined set

|                      |                                               |      |                  |                                                                                                                                                                                                                              |      |      |             |                         |                                                          |    |
|----------------------|-----------------------------------------------|------|------------------|------------------------------------------------------------------------------------------------------------------------------------------------------------------------------------------------------------------------------|------|------|-------------|-------------------------|----------------------------------------------------------|----|
|                      |                                               |      |                  | 8. ACT (yes vs no)<br>9. <i>CELF2</i> rs3740194 (AA vs. AG)<br>10. <i>CELF2</i> rs3740194 (AA vs. GG)<br>11. <i>CELF2</i> rs3740194 (AA vs AG+GG)                                                                            | DMFS | 1.60 | 1.26 – 2.02 | 8.87 x 10 <sup>-5</sup> |                                                          |    |
| Guo et al., 2020 [2] | rs1131636 in <i>RPA1</i> gene                 | 1751 | 545 <sup>3</sup> | 1. Gender (female vs. male)<br>2. Age (≥50 vs. <50)<br>3. Clinical stage (advanced vs. early)<br>4. IMRT (yes vs. no)<br>5. ICT (yes vs. no)<br>6. CCRT (yes vs. no)<br>7. ACT (yes vs. no)<br>8. rs1131636 (additive model) | OS   | 1.33 | 1.20 – 1.47 | 6.31 x 10 <sup>-8</sup> | No data available                                        | 15 |
|                      |                                               |      |                  |                                                                                                                                                                                                                              | DMFS | 1.16 | 1.05 – 1.28 | 0.0033                  |                                                          |    |
| Liu et al., 2012 [3] | miR-142-3p, miR-29c, miR-26a, miR-30e, miR-93 | 156  | 153              | 1. miRNA signature (high risk vs. low risk)<br>2. Sex (male vs. female)<br>3. Age (<45 vs ≥45)<br>4. TNM stage (stage III-IV vs I-II)                                                                                        | OS   | 3.07 | 1.34 – 7.01 | 0.0082                  | CCT, yes vs. no; low-risk group (0.25, 0.08-0.74, 0.013) | 15 |

<sup>3</sup> Validation cohort from Singapore

|                      |                                    |     |                  |                                                                                                                               |      |      |             |        |                                                          |    |
|----------------------|------------------------------------|-----|------------------|-------------------------------------------------------------------------------------------------------------------------------|------|------|-------------|--------|----------------------------------------------------------|----|
|                      |                                    |     |                  | 5. WHO pathological type (undifferentiated non-keratinizing vs differentiated non-keratinizing vs keratinizing squamous cell) | DMFS | 2.39 | 1.05 – 5.42 | 0.037  | CCT, yes vs. no; low-risk group (0.30, 0.10-0.91, 0.033) |    |
|                      |                                    |     |                  | 6. Radiotherapy period interruptions (0 days vs. ≥1 day)                                                                      | DFS  | 3.16 | 1.65 – 6.04 | 0.0011 | CCT, yes vs. no; low-risk group (0.25, 0.09-0.68, 0.007) |    |
|                      |                                    |     |                  | 7. Radiotherapy boosting (no vs. yes)                                                                                         |      |      |             |        |                                                          |    |
|                      |                                    |     |                  | 8. CCT (yes vs no)                                                                                                            |      |      |             |        |                                                          |    |
|                      |                                    |     |                  | 9. VCA IgA (<1:80 vs. 1:80-1:320 vs 1:640)                                                                                    |      |      |             |        |                                                          |    |
|                      |                                    |     |                  | 10. EA IgA (<1:10 vs. 1:10-1:20 vs ≥1.40)                                                                                     |      |      |             |        |                                                          |    |
| Liu et al., 2014 [4] | miR-22, miR-572, miR-638, miR-1234 | 256 | 512 <sup>4</sup> | 1. miRNA signature (high risk vs. low risk)                                                                                   | OS   | 2.40 | 1.71 – 3.37 | <0.001 | No data available                                        | 15 |
|                      |                                    |     |                  | 2. TNM stage (III–IV vs. I–II)                                                                                                | DMFS | 3.31 | 2.18 – 5.02 | <0.001 |                                                          |    |
| Ren et al., 2017 [5] | <i>HOPX</i> hypermethylation       | 188 |                  | 1. Methylation level (high vs. low)                                                                                           | OS   | 2.13 | 1.15 – 3.93 | 0.016  | No data available                                        | 15 |
|                      |                                    |     |                  | 2. Age (≥45 vs. <45)                                                                                                          |      |      |             |        |                                                          |    |
|                      |                                    |     |                  | 3. Sex (male vs. female)                                                                                                      |      |      |             |        |                                                          |    |
|                      |                                    |     |                  | 4. TNM stage (III-IV vs. I-II)                                                                                                |      |      |             |        |                                                          |    |
|                      |                                    |     |                  | 5. WHO type (III vs. I+II)                                                                                                    | DMFS | 2.75 | 1.26 – 6.03 | 0.011  |                                                          |    |
|                      |                                    |     |                  | 6. VCA IgA (≥80 vs <80)                                                                                                       |      |      |             |        |                                                          |    |
|                      |                                    |     |                  | 7. EA IgA (≥10 vs <10)                                                                                                        |      |      |             |        |                                                          |    |

<sup>4</sup> Combined set

|                           |                                                                                                                                               |     |     |                                                                                                                                                                                                                                      |      |      |             |       |                                                           |    |
|---------------------------|-----------------------------------------------------------------------------------------------------------------------------------------------|-----|-----|--------------------------------------------------------------------------------------------------------------------------------------------------------------------------------------------------------------------------------------|------|------|-------------|-------|-----------------------------------------------------------|----|
|                           |                                                                                                                                               |     |     |                                                                                                                                                                                                                                      | DFS  | 1.96 | 1.12 – 3.43 | 0.019 |                                                           |    |
| Ren et al.,<br>2018 [6]   | TIPE3<br>hypermethylation                                                                                                                     | 187 |     | 1. Methylation level (high vs. low)<br>2. Age (>45 vs. ≤45)<br>3. Sex<br>4. TNM stage (III-IV vs. I-II)<br>5. WHO type<br>6. VCA IgA<br>7. EA IgA                                                                                    | OS   | 1.80 | 1.02 – 3.16 | 0.041 | No data available                                         | 15 |
|                           |                                                                                                                                               |     |     |                                                                                                                                                                                                                                      | DMFS | 2.69 | 1.21 – 5.96 | 0.015 |                                                           |    |
|                           |                                                                                                                                               |     |     |                                                                                                                                                                                                                                      | DFS  | 1.71 | 1.01 – 2.89 | 0.045 |                                                           |    |
| Jiang et al.,<br>2015 [7] | Hypermethy-<br>lated gene panel<br>( <i>WIF1</i> ,<br><i>UCHL1</i> ,<br><i>RASSF1A</i> ,<br><i>CCNA1</i> ,<br><i>TP73</i> ,<br><i>SFRP1</i> ) | 150 | 153 | 1. Methylated gene panel (high vs low)<br>2. Sex<br>3. Age (<45 vs ≥45)<br>4. TNM stage (IV vs. III vs. II vs. I)<br>5. WHO pathology type (undifferentiated nonkeratinizing vs. differentiated keratinizing)<br>6. CCT (yes vs. no) | OS   | 1.83 | 1.01 – 3.31 | 0.046 | CCT, yes vs. no; low methylation (0.45, 0.22-0.93, 0.031) | 15 |
|                           |                                                                                                                                               |     |     |                                                                                                                                                                                                                                      | DFS  | 2.08 | 1.17 – 3.68 | 0.013 | CCT, yes vs. no; low methylation (0.58, 0.28-0.96, 0.045) |    |
| Dai et al.,<br>2020 [8]   | COSMIC<br>mutational<br>signatures                                                                                                            | 113 |     | 1. Stage (IV vs I-II)<br>2. Age                                                                                                                                                                                                      | OS   | 1.9  | 1.0 – 3.7   | 0.046 | No relevant                                               | 15 |

|                       |                                                                                                                                |      |                  |                                                                                                                                                                                                                                                                           |                  |       |               |        |                                                           |    |
|-----------------------|--------------------------------------------------------------------------------------------------------------------------------|------|------------------|---------------------------------------------------------------------------------------------------------------------------------------------------------------------------------------------------------------------------------------------------------------------------|------------------|-------|---------------|--------|-----------------------------------------------------------|----|
|                       | (HR & MMR                                                                                                                      |      | 402 <sup>5</sup> | 3. Gender (male vs. female)<br>4. <i>BRCA2</i> germline variants (Positive vs. negative)                                                                                                                                                                                  | PFS <sup>6</sup> | 1.9   | 1.0 – 3.4     | 0.042  | data available                                            |    |
| Wang et al., 2011 [9] | Eight-signature classifier (patient sex, <i>EBV-LMP1</i> , CD14, caveolin-1, p-P70S6K, <i>MMP11</i> , survivin, <i>SPARC</i> ) | 1059 |                  | 1. NPC-SVM Classifier (High risk vs. low risk)<br>2. Age (>46 vs ≤46)<br>3. Clinical stage (III-IV vs I-II)<br>4. WHO classification (keratinizing squamous cell carcinoma and non-keratinizing differentiated carcinoma vs. non-keratinizing undifferentiated carcinoma) | DSS              | 4.9   | 3.0 – 7.9     | <0.001 | No data available                                         | 15 |
| Liu et al., 2020 [10] | Immune signature (PD-L1+CD163+, <i>CXCR5</i> , CD117)                                                                          | 304  |                  | 1. Immune signature (high vs. low risk)<br>2. Gender (male vs. female)<br>3. Age (≥45 vs <45)<br>4. T stage (T3-4 vs T1-2)<br>5. N stage (N2-3 vs N0-1)<br>6. Overall stage (I-III vs IV),<br>7. ECOG score (0 vs 1 vs 2)                                                 | DMFS             | 4.297 | 2.182 – 8.461 | <0.001 | IC+CCR T vs. CCRT; low-risk (0.355, 0.147 - 0.857, 0.021) | 15 |

<sup>5</sup> Prospective

<sup>6</sup> Independent cohort analysis

|                         |                                        |     |                  |                                                                                                                                                                                                                                                 |                   |       |               |           |                                                           |    |
|-------------------------|----------------------------------------|-----|------------------|-------------------------------------------------------------------------------------------------------------------------------------------------------------------------------------------------------------------------------------------------|-------------------|-------|---------------|-----------|-----------------------------------------------------------|----|
|                         |                                        |     |                  | 8. LDH ( $\geq 245$ vs $< 245$ U/L)<br>9. CRP ( $\geq 3$ vs $< 3$ mg/L)<br>10. Hg ( $\geq 130$ vs $< 130$ g/L)<br>11. BMI ( $\geq 23$ vs $< 23$ kg/m <sup>2</sup> )                                                                             | PFS               | 2.115 | 1.289 – 3.469 | 0.003     | IC+CCR T vs. CCRT; low-risk (0.590, 0.351 - 0.992, 0.047) |    |
| Zhang et al., 2013 [11] | <i>DLL4</i> & VEGF expression          | 113 | 444 <sup>7</sup> | 1. <i>DLL4</i> expression (high vs low)<br>2. Age ( $> 47$ vs $\leq 47$ )<br>3. Gender (male vs female)<br>4. TNM stage (III+IV vs I+II)                                                                                                        | DSS <sup>8</sup>  | 1.809 | 1.380 – 2.370 | $< 0.001$ | No data available                                         | 15 |
| Wang et al., 2018 [12]  | Tumour-infiltrating lymphocytes (TILs) | 584 | 304              | 1. TILs (low vs high)<br>2. T stage (T2, T3, T4 vs. T1)<br>3. N stage (N2, N3 vs. N0-N1)<br>4. Radiotherapy technique (IMRT vs 2DRT/3DRT)<br>5. EBV DNA ( $\geq 4000$ copy/mL vs. $< 4000$ copy/mL)<br>6. LDH ( $\geq 245$ U/L vs. $< 245$ U/L) | OS <sup>9</sup>   | 0.52  | 0.32 – 0.84   | 0.008     | No data available                                         | 15 |
|                         |                                        |     |                  |                                                                                                                                                                                                                                                 | DMFS <sup>9</sup> | 0.47  | 0.27 – 0.82   | 0.007     |                                                           |    |
|                         |                                        |     |                  |                                                                                                                                                                                                                                                 | DFS               | 0.52  | 0.34 – 0.79   | 0.002     | IMRT vs. 2DRT/3DRT (0.37, 0.23-0.60, $< 0.000$ )          |    |

<sup>7</sup> Combined set

<sup>8</sup> Overall cases

<sup>9</sup> Univariate analysis

|                           |                                                                                                                                                                                                                                                                  |     |     |                                                                                                                                                                                                                                                                                                                                                                                                                                                                                                                                                                                                                                                                                                                                        |      |      |             |         |                                                    |    |
|---------------------------|------------------------------------------------------------------------------------------------------------------------------------------------------------------------------------------------------------------------------------------------------------------|-----|-----|----------------------------------------------------------------------------------------------------------------------------------------------------------------------------------------------------------------------------------------------------------------------------------------------------------------------------------------------------------------------------------------------------------------------------------------------------------------------------------------------------------------------------------------------------------------------------------------------------------------------------------------------------------------------------------------------------------------------------------------|------|------|-------------|---------|----------------------------------------------------|----|
| Tang et al.,<br>2018 [13] | 13 gene-<br>signature<br>( <i>YBX3</i> ,<br><i>CBR3</i> ,<br><i>CXCL10</i> ,<br><i>CLASP1</i> ,<br><i>DCTN1</i> ,<br><i>FNDC3B</i> ,<br><i>WSB2</i> ,<br><i>LRIG1</i> ,<br><i>GRM4</i> ,<br><i>ANXA1</i> ,<br><i>WNK1</i> ,<br><i>HDLBP</i> ,<br><i>POLR2M</i> ) | 204 | 165 | <ol style="list-style-type: none"> <li>DMGN (high vs. low)</li> <li>Gender (male vs. female)</li> <li>Age (<math>\geq 45</math> vs <math>&lt; 45</math>)</li> <li>N-stage (N2-3 vs N0-1)</li> <li>T-stage (T3-4 vs T1-2)</li> <li>PET-CT (no vs. yes)</li> <li>VCA-IgA (<math>\geq 1:80</math>, vs <math>&lt; 1:80</math>)</li> <li>EA-IgA (<math>\geq 1:10</math> vs. <math>&lt; 1:10</math>)</li> <li>LDH (<math>\geq 245</math> vs. <math>&lt; 245</math> U/L)</li> <li>CRP (<math>\geq 8.2</math> vs. <math>&lt; 8.2</math> mg/L)</li> <li>Hg (<math>\geq 120</math> vs. <math>&lt; 120</math> g/L)</li> <li>BMI (<math>\geq 18.5</math> vs <math>&lt; 18.5</math> kg/m<sup>3</sup>)</li> <li>Chemotherapy (no vs. yes)</li> </ol> | OS   | 2.05 | 1.23 – 3.43 | 0.0061  | CCT, yes vs. no; low risk (0.58, 0.35-0.97, 0.036) | 15 |
|                           |                                                                                                                                                                                                                                                                  |     |     |                                                                                                                                                                                                                                                                                                                                                                                                                                                                                                                                                                                                                                                                                                                                        | DMFS | 3.32 | 1.74 – 6.33 | 0.00028 | CCT, yes vs. no; low risk (0.40, 0.19-0.83, 0.011) |    |
|                           |                                                                                                                                                                                                                                                                  |     |     |                                                                                                                                                                                                                                                                                                                                                                                                                                                                                                                                                                                                                                                                                                                                        | DFS  | 2.35 | 1.40 – 3.95 | 0.0012  | CCT, yes vs. no; low risk (0.56, 0.34-0.94, 0.025) |    |



|                          |                                                       |     |                   |                                                                                                                                                                                                  |     |       |               |           |                      |    |
|--------------------------|-------------------------------------------------------|-----|-------------------|--------------------------------------------------------------------------------------------------------------------------------------------------------------------------------------------------|-----|-------|---------------|-----------|----------------------|----|
| Gao et al.,<br>2017 [14] | Protein<br>tyrosine<br>phosphatase<br>4A2<br>(PTP4A2) | 201 | 266 <sup>10</sup> | 1. Age ( $\geq 45$ vs $< 45$ )<br>2. Gender (male vs female)<br>3. T status (T3-4 vs T1-2)<br>4. N status (N2-3 vs N0-1)<br>5. TNM stage (III-IV vs I-II)<br>6. WHO type (Type III vs Type I-II) | OS  | 5.065 | 3.490 – 7.351 | $< 0.001$ | No data<br>available | 15 |
|                          |                                                       |     |                   | 7. VCA IgA ( $\geq 1:80$ vs $< 1:80$ )<br>8. EA IgA ( $\geq 1:10$ vs $< 1:10$ )                                                                                                                  | DFS | 3.669 | 2.635 – 5.110 | $< 0.001$ |                      |    |

HR, hazard ratio; CI confidence interval; OS, overall survival; DMFS, distant-metastasis free survival; DFS, diseases-free survival; PFS, progression-free survival; DSS, disease-specific survival; RT, radiotherapy; IMRT, intensity modulated radiotherapy; ICT, induction chemotherapy; CCT, concurrent chemotherapy; CCRT, concurrent chemoradiotherapy; ICT, induction chemotherapy; VCA IgA, viral capsid antigen immunoglobulin-A; EA IgA, early antigen immunoglobulin-A; ECOG, Eastern Cooperative Oncology Group; LDH, lactate dehydrogenase; CRP, C-reactive protein; Hg, hemoglobin; BMI, body mass index; PET-CT, Positron Emission Tomography and Computed Tomography; DMGN, distant metastasis gene signature

## References

1. Guo, Y. M., M. X. Sun, J. Li, T. T. Liu, H. Z. Huang, J. R. Chen, W. S. Liu, Q. S. Feng, L. Z. Chen, J. X. Bei, and Y. X. Zeng. "Association of Celf2 Polymorphism and the Prognosis of Nasopharyngeal Carcinoma in Southern Chinese Population." *Oncotarget* 6, no. 29 (2015): 27176-86.
2. Guo, Y. M., J. R. Chen, Y. C. Feng, M. L. K. Chua, Y. Zeng, E. P. Hui, A. K. C. Chan, L. Q. Tang, L. Wang, Q. Cui, H. Q. Han, C. L. Luo, G. W. Lin, Y. Liang, Y. Liu, Z. L. He, Y. X. Liu, P. P. Wei, C. J. Liu, W. Peng, B. W. Han, X. Y. Zuo, E. H. W. Ong, E. L. L. Yeo, K. P. Low, G. S. Tan, T. K. H. Lim, J. S. G. Hwang, B. Li, Q. S. Feng, X. Xia, Y. F. Xia, J. Ko, W. Dai, M. L. Lung, A. T. C. Chan, D. Y. M. Lo, M. S. Zeng, H. Q. Mai, J. Liu, Y. X. Zeng, and J. X. Bei. "Germline Polymorphisms and Length of Survival of Nasopharyngeal Carcinoma: An Exome-Wide Association Study in Multiple Cohorts." *Adv Sci (Weinh)* 7, no. 10 (2020): 1903727.

---

<sup>10</sup> Overall cases

3. Liu, N., N. Y. Chen, R. X. Cui, W. F. Li, Y. Li, R. R. Wei, M. Y. Zhang, Y. Sun, B. J. Huang, M. Chen, Q. M. He, N. Jiang, L. Chen, W. C. Cho, J. P. Yun, J. Zeng, L. Z. Liu, L. Li, Y. Guo, H. Y. Wang, and J. Ma. "Prognostic Value of a MicroRNA Signature in Nasopharyngeal Carcinoma: A MicroRNA Expression Analysis." *Lancet Oncol* 13, no. 6 (2012): 633-41.
4. Liu, N., R. X. Cui, Y. Sun, R. Guo, Y. P. Mao, L. L. Tang, W. Jiang, X. Liu, Y. K. Cheng, Q. M. He, W. C. Cho, L. Z. Liu, L. Li, and J. Ma. "A Four-Mirna Signature Identified from Genome-Wide Serum Mirna Profiling Predicts Survival in Patients with Nasopharyngeal Carcinoma." *Int J Cancer* 134, no. 6 (2014): 1359-68.
5. Ren, X., X. Yang, B. Cheng, X. Chen, T. Zhang, Q. He, B. Li, Y. Li, X. Tang, X. Wen, Q. Zhong, T. Kang, M. Zeng, N. Liu, and J. Ma. "HoxA Hypermethylation Promotes Metastasis Via Activating Snail Transcription in Nasopharyngeal Carcinoma." *Nat Commun* 8 (2017): 14053.
6. Ren, X. Y., X. Wen, Y. Q. Li, J. Zhang, Q. M. He, X. J. Yang, X. R. Tang, Y. Q. Wang, P. P. Zhang, X. Z. Chen, B. Cheng, J. Ma, and N. Liu. "TET3 Hypermethylation Correlates with Worse Prognosis and Promotes Tumor Progression in Nasopharyngeal Carcinoma." *J Exp Clin Cancer Res* 37, no. 1 (2018): 227.
7. Jiang, W., N. Liu, X. Z. Chen, Y. Sun, B. Li, X. Y. Ren, W. F. Qin, N. Jiang, Y. F. Xu, Y. Q. Li, J. Ren, W. C. Cho, J. P. Yun, J. Zeng, L. Z. Liu, L. Li, Y. Guo, H. Q. Mai, M. S. Zeng, T. B. Kang, W. H. Jia, J. Y. Shao, and J. Ma. "Genome-Wide Identification of a Methylation Gene Panel as a Prognostic Biomarker in Nasopharyngeal Carcinoma." *Mol Cancer Ther* 14, no. 12 (2015): 2864-73.
8. Dai, W., D. L. Chung, L. K. Chow, V. Z. Yu, L. C. Lei, M. M. Leong, C. K. Chan, J. M. Ko, and M. L. Lung. "Clinical Outcome-Related Mutational Signatures Identified by Integrative Genomic Analysis in Nasopharyngeal Carcinoma." *Clin Cancer Res* 26, no. 24 (2020): 6494-504.
9. Wang, H. Y., B. Y. Sun, Z. H. Zhu, E. T. Chang, K. F. To, J. S. Hwang, H. Jiang, M. K. Kam, G. Chen, S. L. Cheah, M. Lee, Z. W. Liu, J. Chen, J. X. Zhang, H. Z. Zhang, J. H. He, F. L. Chen, X. D. Zhu, M. Y. Huang, D. Z. Liao, J. Fu, Q. Shao, M. B. Cai, Z. M. Du, L. X. Yan, C. F. Hu, H. K. Ng, J. T. Wee, C. N. Qian, Q. Liu, I. Ernberg, W. Ye, H. O. Adami, A. T. Chan, Y. X. Zeng, and J. Y. Shao. "Eight-Signature Classifier for Prediction of Nasopharyngeal [Corrected] Carcinoma Survival." *J Clin Oncol* 29, no. 34 (2011): 4516-25.
10. Liu, S. L., L. J. Bian, Z. X. Liu, Q. Y. Chen, X. S. Sun, R. Sun, D. H. Luo, X. Y. Li, B. B. Xiao, J. J. Yan, Z. J. Lu, S. M. Yan, L. Yuan, L. Q. Tang, J. M. Li, and H. Q. Mai. "Development and Validation of the Immune Signature to Predict Distant Metastasis in Patients with Nasopharyngeal Carcinoma." *J Immunother Cancer* 8, no. 1 (2020).
11. Zhang, J. X., M. B. Cai, X. P. Wang, L. P. Duan, Q. Shao, Z. T. Tong, D. Z. Liao, Y. Y. Li, M. Y. Huang, Y. X. Zeng, and J. Y. Shao. "Elevated Dll4 Expression Is Correlated with Vegf and Predicts Poor Prognosis of Nasopharyngeal Carcinoma." *Med Oncol* 30, no. 1 (2013): 390.
12. Wang, Y. Q., Y. P. Chen, Y. Zhang, W. Jiang, N. Liu, J. P. Yun, Y. Sun, Q. M. He, X. R. Tang, X. Wen, X. J. Yang, P. P. Zhang, J. Zhang, Y. Lei, Y. Q. Li, and J. Ma. "Prognostic Significance of Tumor-Infiltrating Lymphocytes in Nondisseminated Nasopharyngeal Carcinoma: A Large-Scale Cohort Study." *Int J Cancer* 142, no. 12 (2018): 2558-66.
13. Tang, X. R., Y. Q. Li, S. B. Liang, W. Jiang, F. Liu, W. X. Ge, L. L. Tang, Y. P. Mao, Q. M. He, X. J. Yang, Y. Zhang, X. Wen, J. Zhang, Y. Q. Wang, P. P. Zhang, Y. Sun, J. P. Yun, J. Zeng, L. Li, L. Z. Liu, N. Liu, and J. Ma. "Development and Validation of a Gene Expression-Based Signature to Predict Distant Metastasis in Locoregionally Advanced Nasopharyngeal Carcinoma: A Retrospective, Multicentre, Cohort Study." *Lancet Oncol* 19, no. 3 (2018): 382-93.

14. Gao, Y., M. Zhang, Z. Zheng, Y. He, Y. Zhu, Q. Cheng, J. Rong, H. Weng, C. Chen, Y. Xu, M. Yun, J. Zhang, and S. Ye. "Over-Expression of Protein Tyrosine Phosphatase 4a2 Correlates with Tumor Progression and Poor Prognosis in Nasopharyngeal Carcinoma." *Oncotarget* 8, no. 44 (2017): 77527-39.
